# Supplementary material for: Choose Your Weaponry: Selective Storage of a Single Toxic Compound, Latrunculin A, by Closely Related Nudibranch Molluscs
Source: PLoS One. 2016 Jan 20;11(1):e0145134. doi: 10.1371/journal.pone.0145134 (PMC4720420; doi:10.1371/journal.pone.0145134)
Supplement: S3 Fig — (DOCX) [file pone.0145134.s003.docx]

**S3 Fig.** 1H NMR spectra (500 MHz, CDCl3) of *C. magnifica* crude extracts containing 1,4-dimethoxybenzene (DMB) as an internal standard.


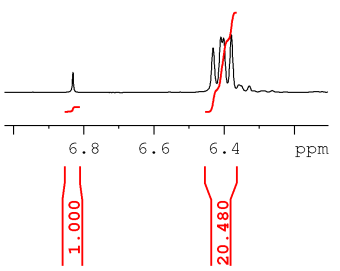

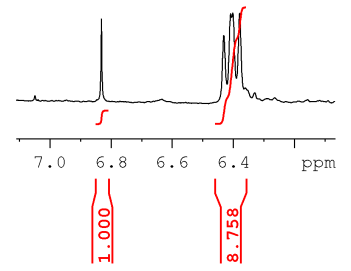

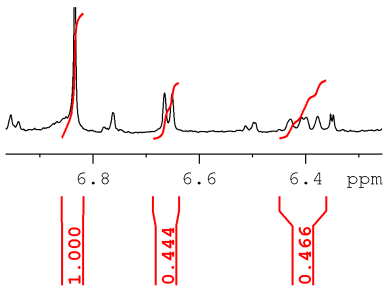

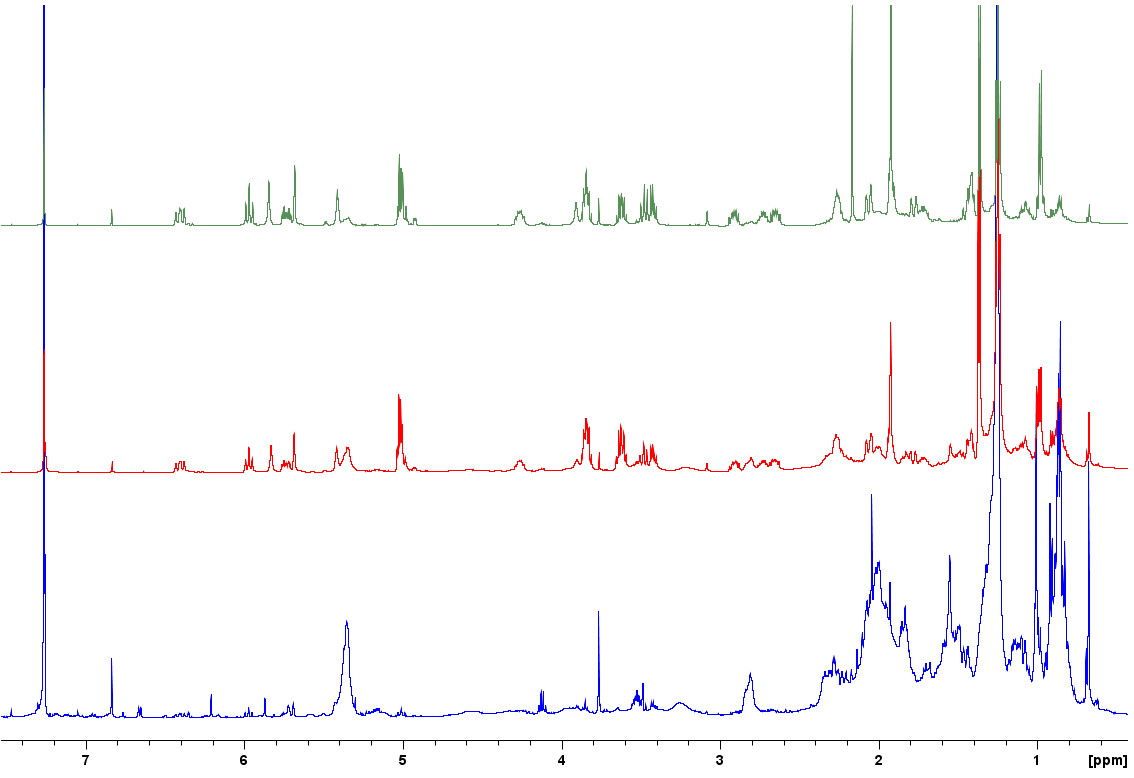


**H7**

**Viscera**

**H15’**

**DMB**

**H7**

**DMB**

**Mantle**

**Mantle rim**
